# Supplementary material for: A functional hydrogel dressing based on glycyrrhizic acid with low-swelling and moisturizing properties for enhancing infected wound repair
Source: Royal Society of Chemistry journal article supplement (doi:10.1039/d4tb01572j), 2024-12-02
Supplement: d4tb01572j1.pdf [file d4tb01572j1.pdf]

## **A functional hydrogel dressing based on glycyrrhizic acid with low-swelling and moisturizing for enhancing infected wound repair**

Ji Wang<sup>1</sup>, Wei Wang<sup>2</sup>, Kejun Li<sup>2</sup>, Yanhua Wu<sup>2</sup>, Xiaoting Yang<sup>2</sup>, Jiping Zhou<sup>1</sup>, Zhijie Zhang<sup>3,\*</sup>, Yongjun Jiang<sup>2,\*</sup>

<sup>1</sup>Department of Rehabilitation, Shenzhen Dapeng New District Nan'ao People's Hospital, Shenzhen, 518000, PR China.

<sup>2</sup>Department of Rehabilitation, Shenzhen Pingle Orthopedic Hospital (Shenzhen Pingshan District Hospital of Traditional Chinese Medicine), Shenzhen, 518000, PR China.

<sup>3</sup>Rehabilitation Therapy Center, Luoyang Orthopedic-Traumatological Hospital of Henan Province (Henan Province Orthopedic Hospital), Luoyang, 471000, PR China.

\*Corresponding authors.

E-mail: [sportspt@163.com](mailto:sportspt@163.com) (ZJ. Zhang), [2450687893@qq.com](mailto:2450687893@qq.com) (YJ. Jiang)

## Results

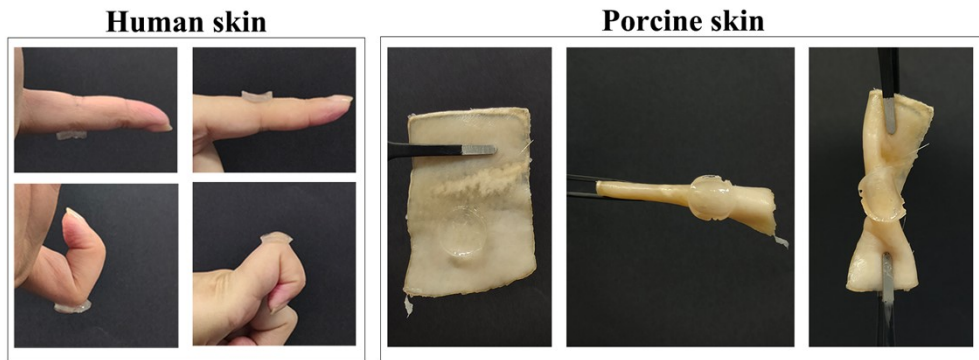

Fig S1. Images of hydrogels adhered to human skin and porcine skin.

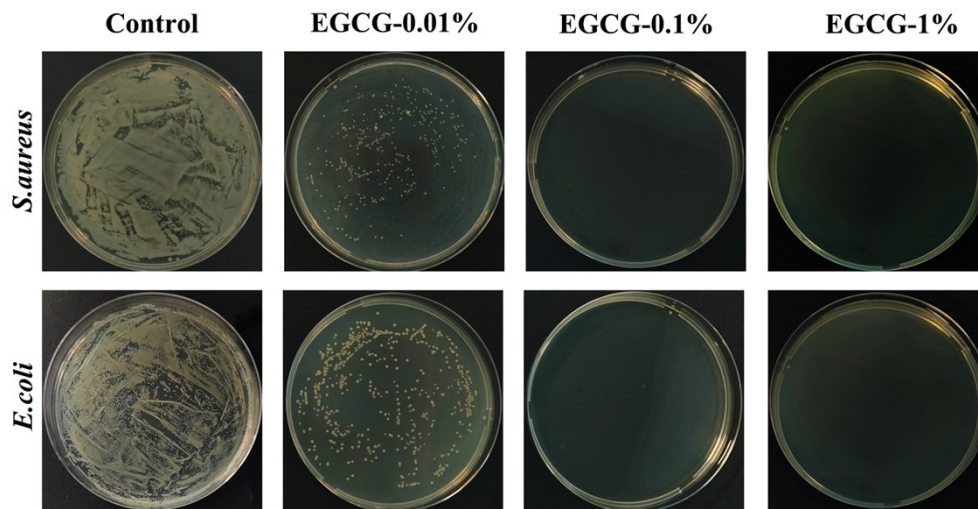

Fig S2. Images of EGCG with different concentrations against *S.aureus* and *E.coli*.
